# Supplementary material
Source: Springer Nature journal article supplement (https://www.springermedizin.de/resource/supplementary/12986_2011_427_MOESM2_ESM.pdf/25656076)

Homocysteine

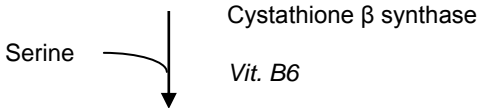

Cystathione

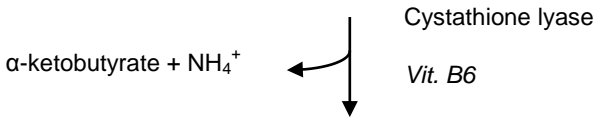

Cysteine

Supplement: MOESM2 [file 25656076]
